# Supplementary material
Source: PubMed Central journal article supplement (PMC2863804)
Supplement: supp_84_10_5052__1.pdf [file supp_84_10_5052__1.pdf]

Table S1. Oligonucleotides used in this study

| Name  | Sequence                                 |
|-------|------------------------------------------|
| DNTG1 | CGGTGTCGGTCTCGTAG                        |
| kanC  | TGATTTTGATGACGAGCGTAAT                   |
| SPTF  | AGGCTTCAAGCGCAGCGCACAGA                  |
| SPTR  | CAGGAGTATCACCGTTCTGTAGAG                 |
| PJ47  | GCATTCCCCAGCCGCATC                       |
| PJ48  | CCGATGGACTCCAACACTAGTTCTGC               |
| PJ50  | CTAGGGGAAGCCTGTATGACCAAGGG               |
| PJ51  | CGTTGCTAACGGCATGGCATAAAC                 |
| PJ56  | TCTGTTTGGCGTTCGCACAAGCG                  |
| PJ57  | GGGCCGCAAGCTTTATGATAAGCCAGCAC            |
| PJ60  | TGGGATCCTTATTGAGAACCAGAGTGTCTAGCTTC      |
| PJ61  | TGTCTAGATTATTGAGAACCAGAGTGTCTAGCTTC      |
| PJ62  | CAGCCAGGGCTCACATGGACAACACTGAAGACG        |
| PJ63  | CGTCTTCAGTGTTGTCCATGTGAGCCCTGGCTGTTTTTCG |
| PJ64  | TCCTCGAGGAGAACTTCTAGTATATTCTG            |
| PJ68  | CAGAATCAGGAAAACATGGACAACACTGAAGACG       |
| PJ69  | CGTCTTCAGTGTTGTCCATGTTTTCTGATTCTGGAGAATG |
| PJ70  | CCGCGAAGCTTATGAAGCCTCACTTCAGAAAC         |



PJ359 TCAGGGTCTAATGAATTATTAAGCATTTTGCATAGGAAGTGAA  
AGCTGTGCGGTATTTACACCCG

PJ360 GCTGCCTTCATTTACAGTGTGTCTATAAAACGTATAACACTTAT  
TAGATTGTA CTGAGAGTGCAC

---
